# Supplementary material
Source: publisher figshare collection journal article supplement (https://sage.figshare.com/ndownloader/files/21240228)
Supplement: Supplementary file 1 [file 21240228]

Supplementary Table 1. Regression model: variables associated with inappropriate delivery of DMT (as prescribed by neurologist) and problems acquiring DMT (first prescription or during follow-up).

| Variable                     | Logistic regression*    |                   | Logistic regression**   |                   |
|------------------------------|-------------------------|-------------------|-------------------------|-------------------|
|                              | OR                      | P-value           | OR                      | P-value           |
| Age                          | <b>1.04 (0.97-1.12)</b> | <b>0.19</b>       | 0.99 (0.93-1.05)        | 0.86              |
| Male gender                  | 0.95 (.0.69-1.31)       | 0.76              | 0.97 (.0.75-1.27)       | 0.87              |
| MS duration                  | <b>1.02 (1.01-1.04)</b> | <b>0.001</b>      | 1.00 (0.98-1.01)        | 0.90              |
| Progressive course           | 1.00 (0.71-1.42)        | 0.95              | 1.23 (0.92-1.64)        | 0.15              |
| Without healthcare insurance | <b>2.21 (1.51-3.24)</b> | <b>&lt; 0.001</b> | <b>2.42 (1.72-3.40)</b> | <b>&lt; 0.001</b> |
| Level of education (high)    | <b>0.66 (0.48-0.90)</b> | <b>0.009</b>      | <b>0.76 (0.58-0.99)</b> | <b>0.04</b>       |
| Currently working            | <b>0.73 (0.55-0.98)</b> | <b>0.03</b>       | 0.80 (0.93-1.05)        | 0.06              |

\*Not currently taking DMT prescribed by their neurologist was used as the dependent variable. \*\* Problems acquiring DMTs (first prescription or during follow-up) was used as the dependent variable.

Variables were dichotomized into: MS course (progressive and relapsing/CIS), health insurance coverage (with or without), level of education high (tertiary and university) and low-medium (primary and secondary) and finally currently working (yes or no)
